# Supplementary material
Source: PubMed Central journal article supplement (PMC7876889)

## Supplementary Figure Legends

**Supplementary Figure 1. Progression-free survival in treatment subgroups by first-line therapy in the ASCT-intent subgroup: (A) triplet therapy (VRd, CVd, CTd, or VTd); (B) bortezomib-only with no IMiD (CVd or Vd); (C) doublet therapy (Rd, Td, or Vd); (D) VRd; and (E) IMiD-only therapy (Rd or Td).**

### Supplementary Figure 1.

**A**

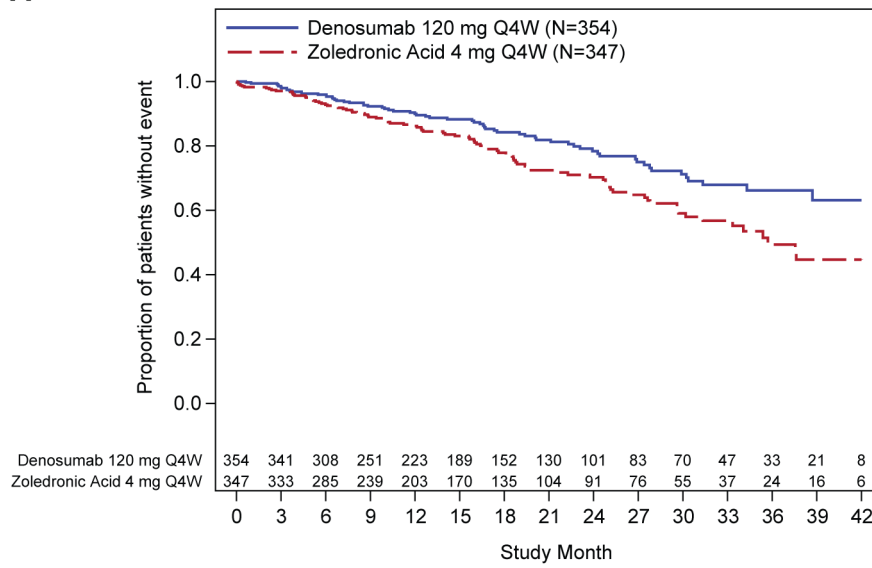

**B**

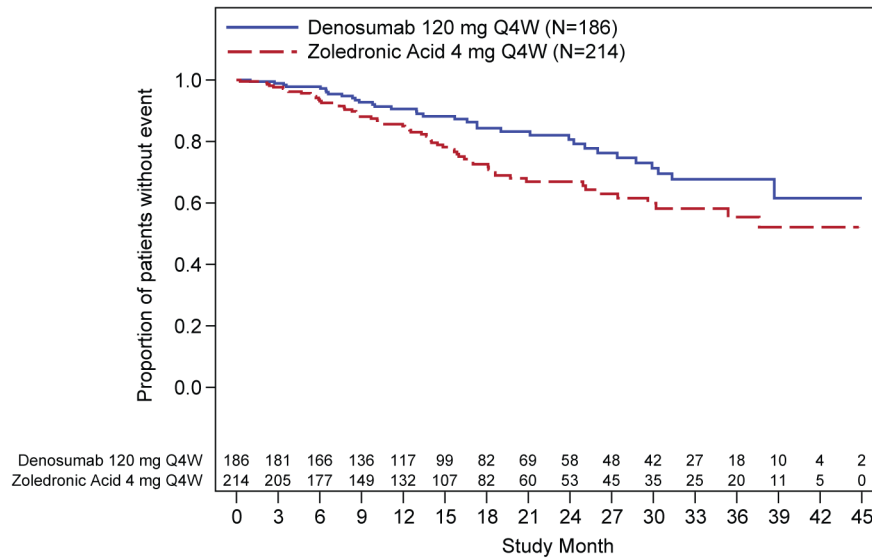

**C**

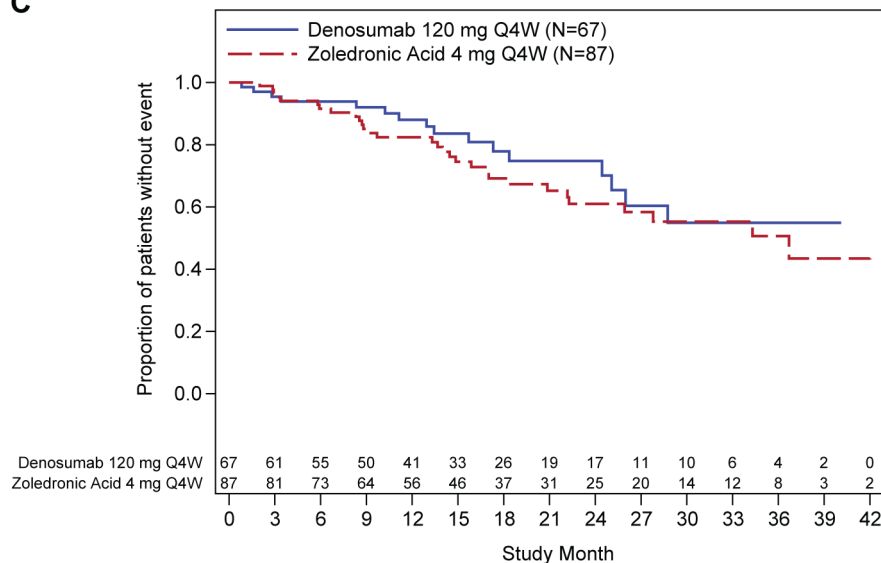

**D**

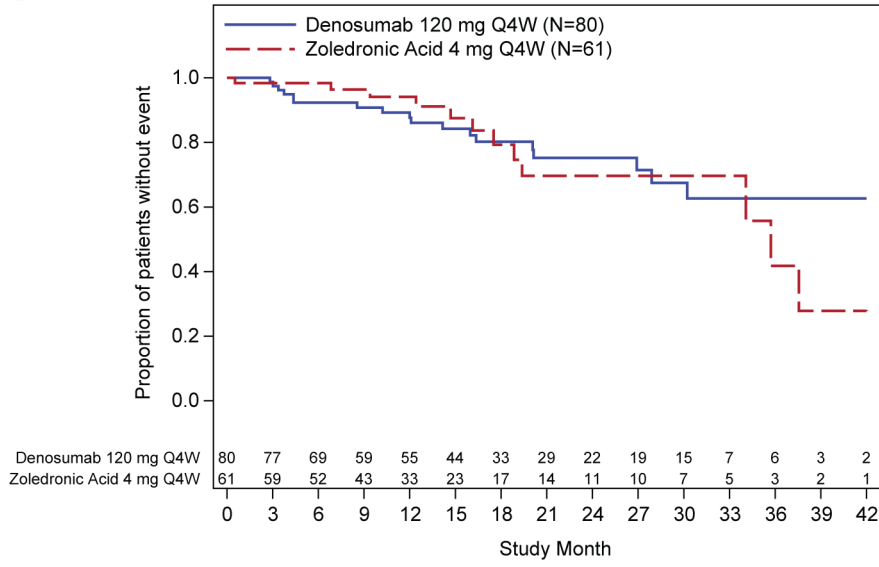

**E**

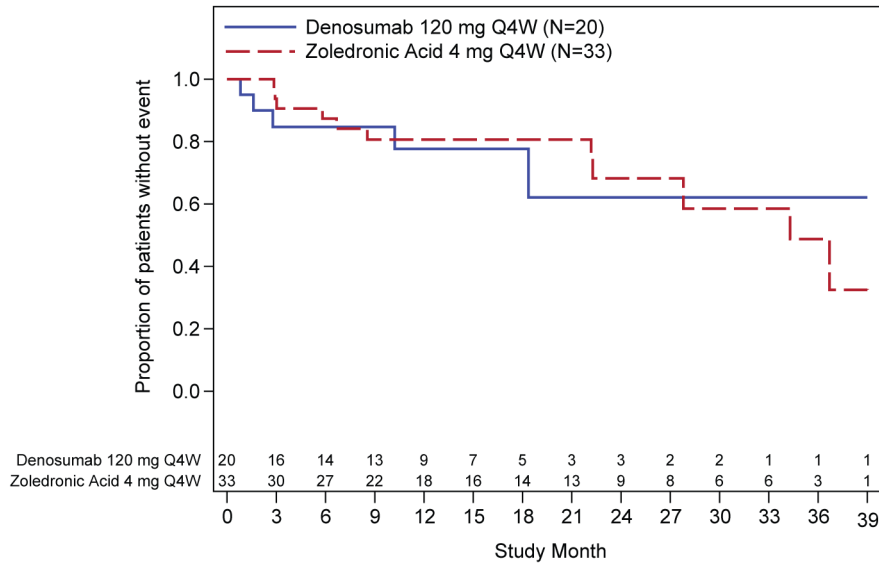

Supplement: advancesADV2020002378-suppl1.pdf [file advancesADV2020002378-suppl1.pdf]
